# Supplementary material for: Protein Design Using Continuous Rotamers
Source: PLOS journal article supplement (doi:10.1371/journal.pcbi.1002335), 2012-01-12
Supplement: S1 (10.1371/journal.pcbi.1002335.s001) [file journal.pcbi.1002335.s001]

## Supplementary Table S1

| Amino acid type | Wild-type count <sup>a</sup> | rigidGMEC recovery <sup>b</sup> | rigidGMEC recovery <sup>c</sup> | minGMEC recovery <sup>d</sup> | minGMEC recovery <sup>e</sup> |
|-----------------|------------------------------|---------------------------------|---------------------------------|-------------------------------|-------------------------------|
| ASP             | 7                            | 6                               | 85.71%                          | 7                             | 100.00%                       |
| LYS             | 2                            | 2                               | 100.00%                         | 1                             | 50.00%                        |
| ILE             | 77                           | 52                              | 67.53%                          | 59                            | 76.62%                        |
| TRP             | 12                           | 6                               | 50.00%                          | 11                            | 91.67%                        |
| GLY             | 34                           | 33                              | 97.06%                          | 34                            | 100.00%                       |
| PHE             | 37                           | 15                              | 40.54%                          | 25                            | 67.57%                        |
| GLN             | 4                            | 3                               | 75.00%                          | 3                             | 75.00%                        |
| SER             | 19                           | 7                               | 36.84%                          | 13                            | 68.42%                        |
| ASN             | 13                           | 10                              | 76.92%                          | 9                             | 69.23%                        |
| LEU             | 81                           | 57                              | 70.37%                          | 69                            | 85.19%                        |
| VAL             | 110                          | 93                              | 84.55%                          | 91                            | 82.73%                        |
| TYR             | 17                           | 4                               | 23.53%                          | 8                             | 47.06%                        |
| GLU             | 1                            | 0                               | 0.00%                           | 1                             | 100.00%                       |
| ARG             | 3                            | 1                               | 33.33%                          | 2                             | 66.67%                        |
| THR             | 21                           | 9                               | 42.86%                          | 13                            | 61.90%                        |
| ALA             | 68                           | 60                              | 88.24%                          | 62                            | 91.18%                        |
| MET             | 17                           | 12                              | 70.59%                          | 14                            | 82.35%                        |
| HIS             | 4                            | 3                               | 75.00%                          | 4                             | 100.00%                       |
| Total           | 527                          | 373                             | 70.78%                          | 426                           | 80.83%                        |
